# Supplementary material for: Running the full human developmental clock in interspecies chimeras using alternative human stem cells with expanded embryonic potential
Source: PubMed Central journal article supplement (PMC8128894; doi:10.1038/s41536-021-00135-1), 2021-05-17

Fig. 5a hESC Western blots

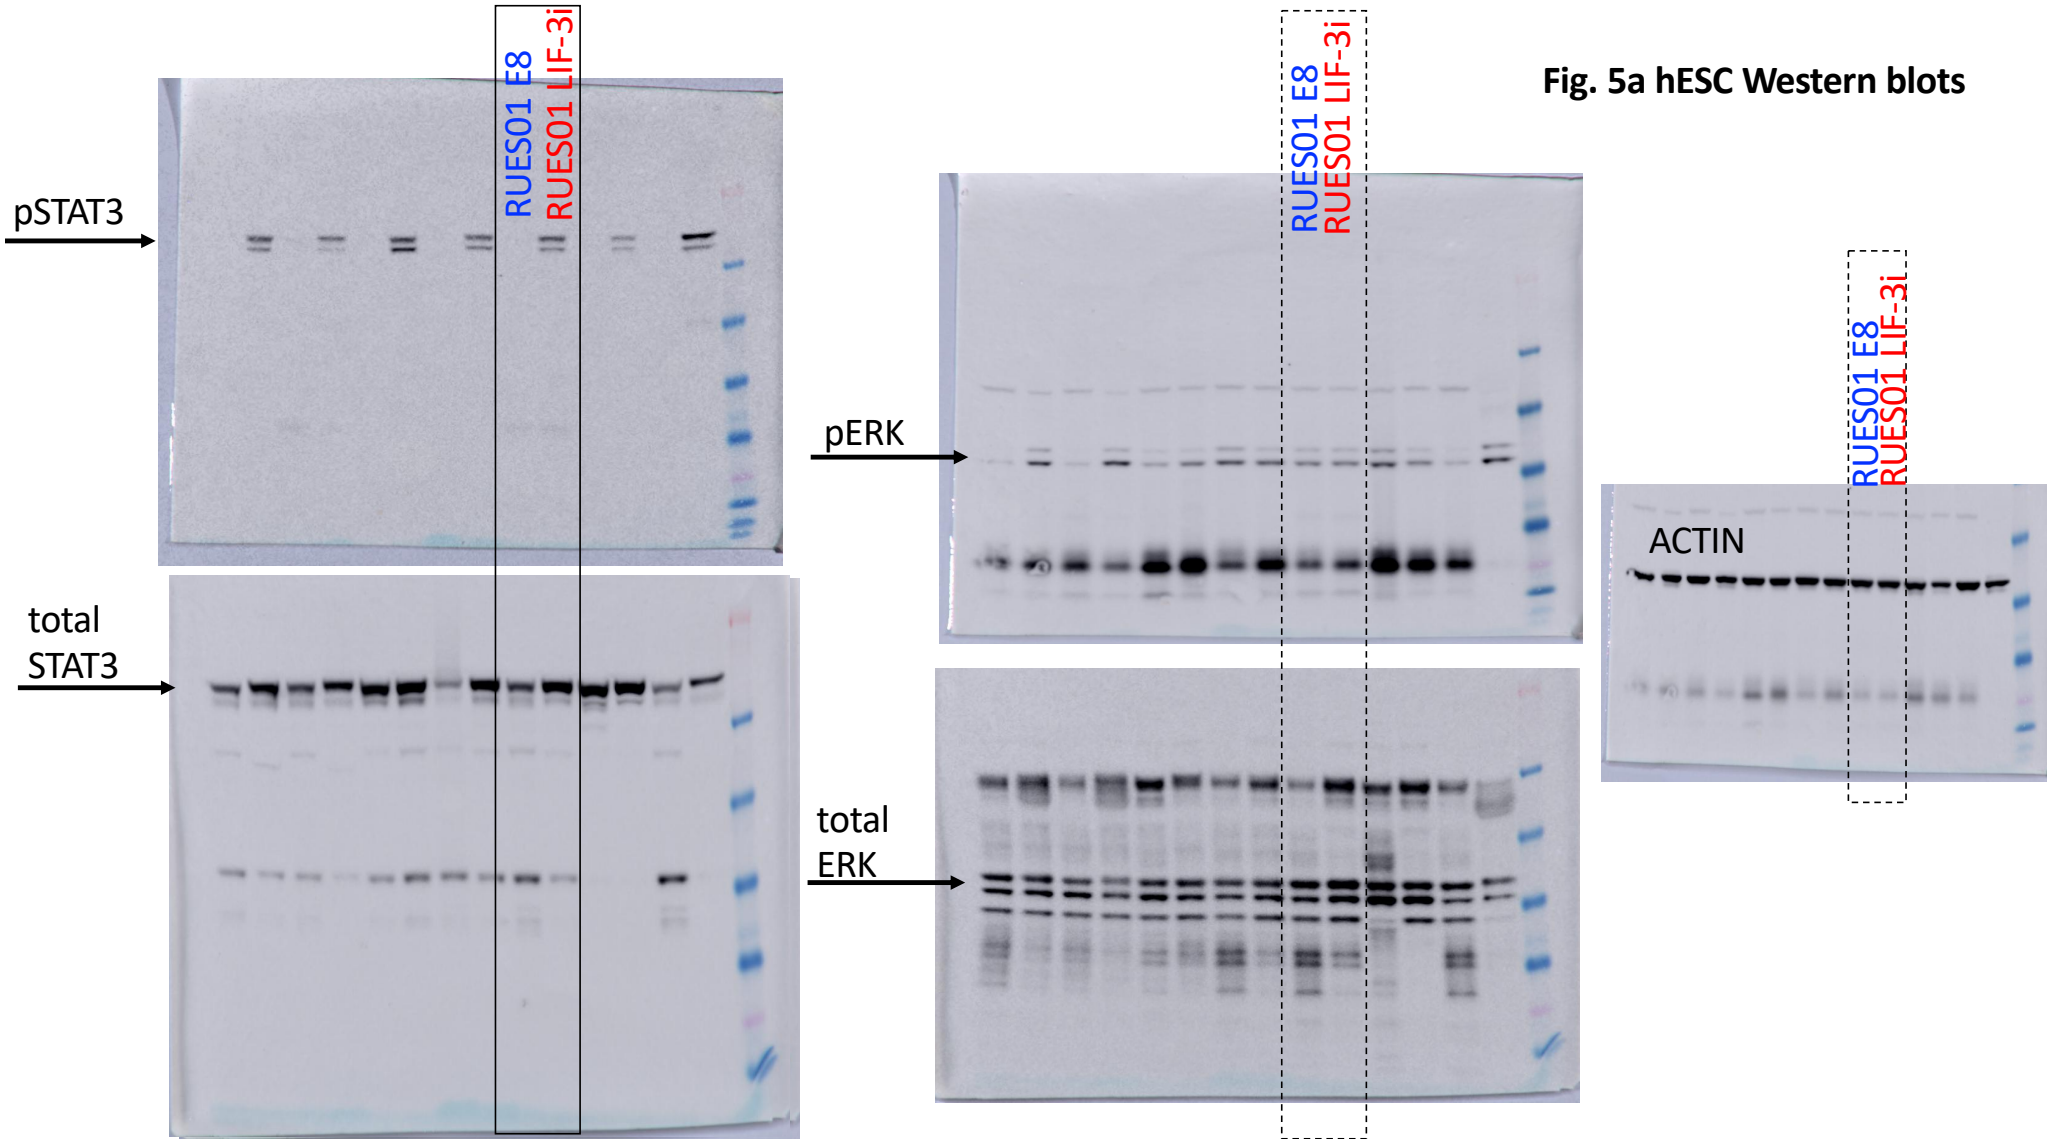

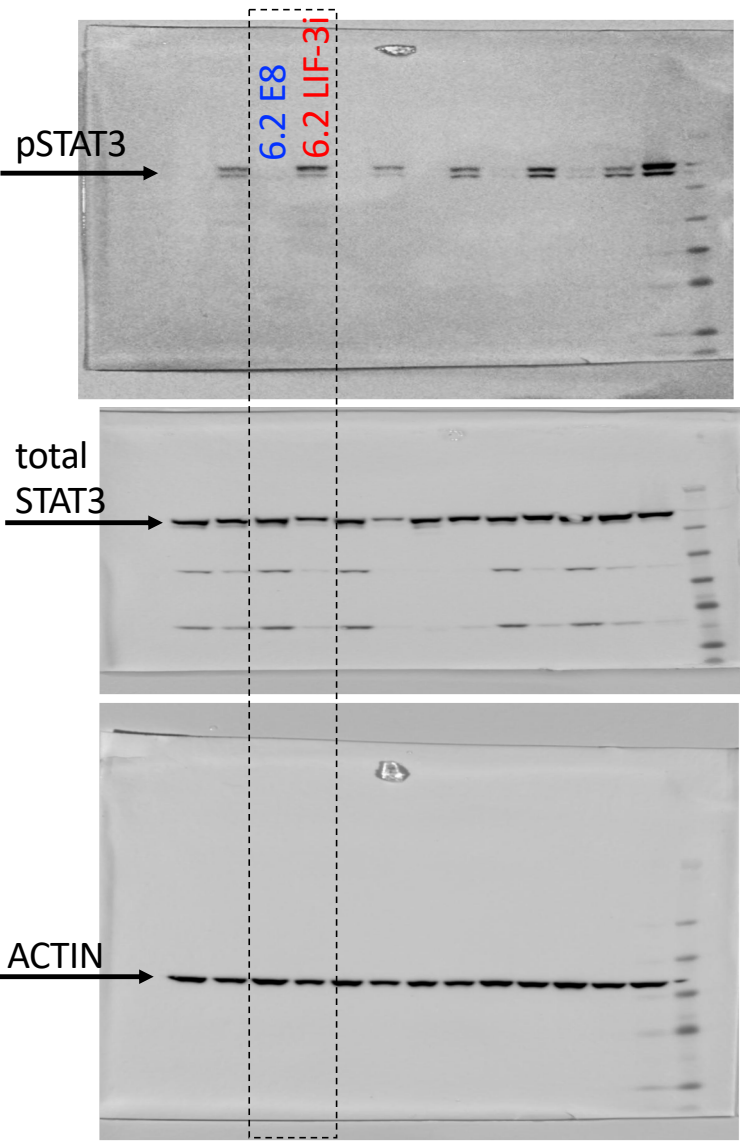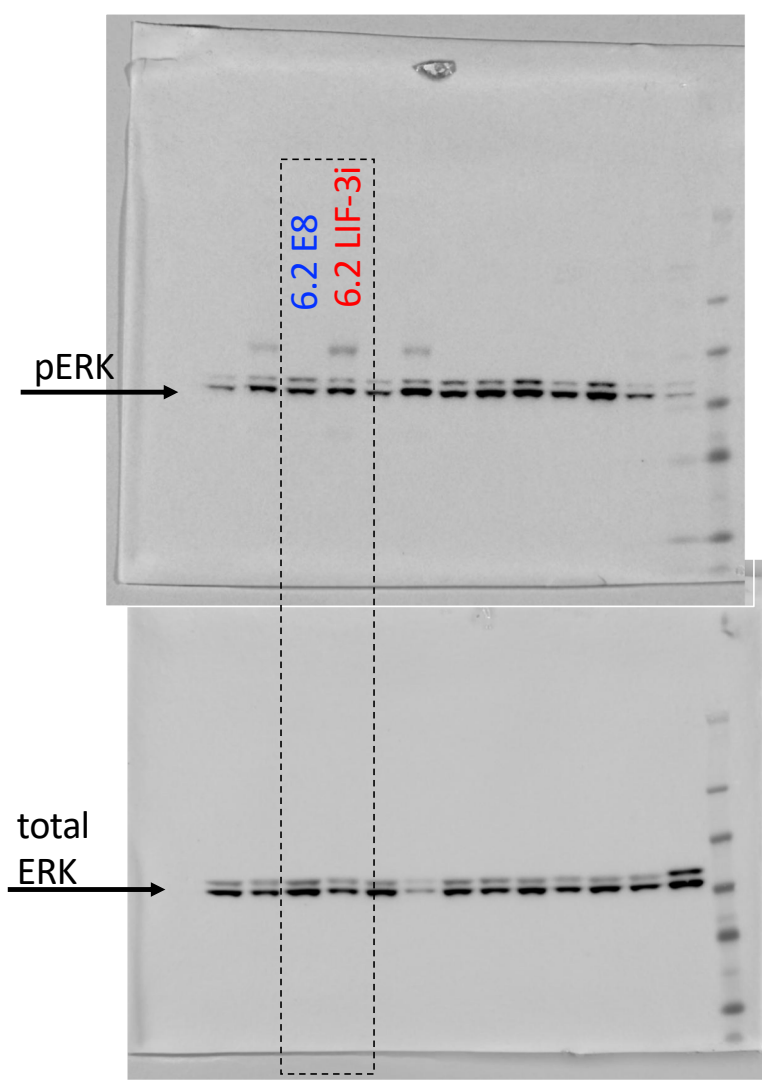

**Fig. 5a**  
**CB-iPSC Western blots**

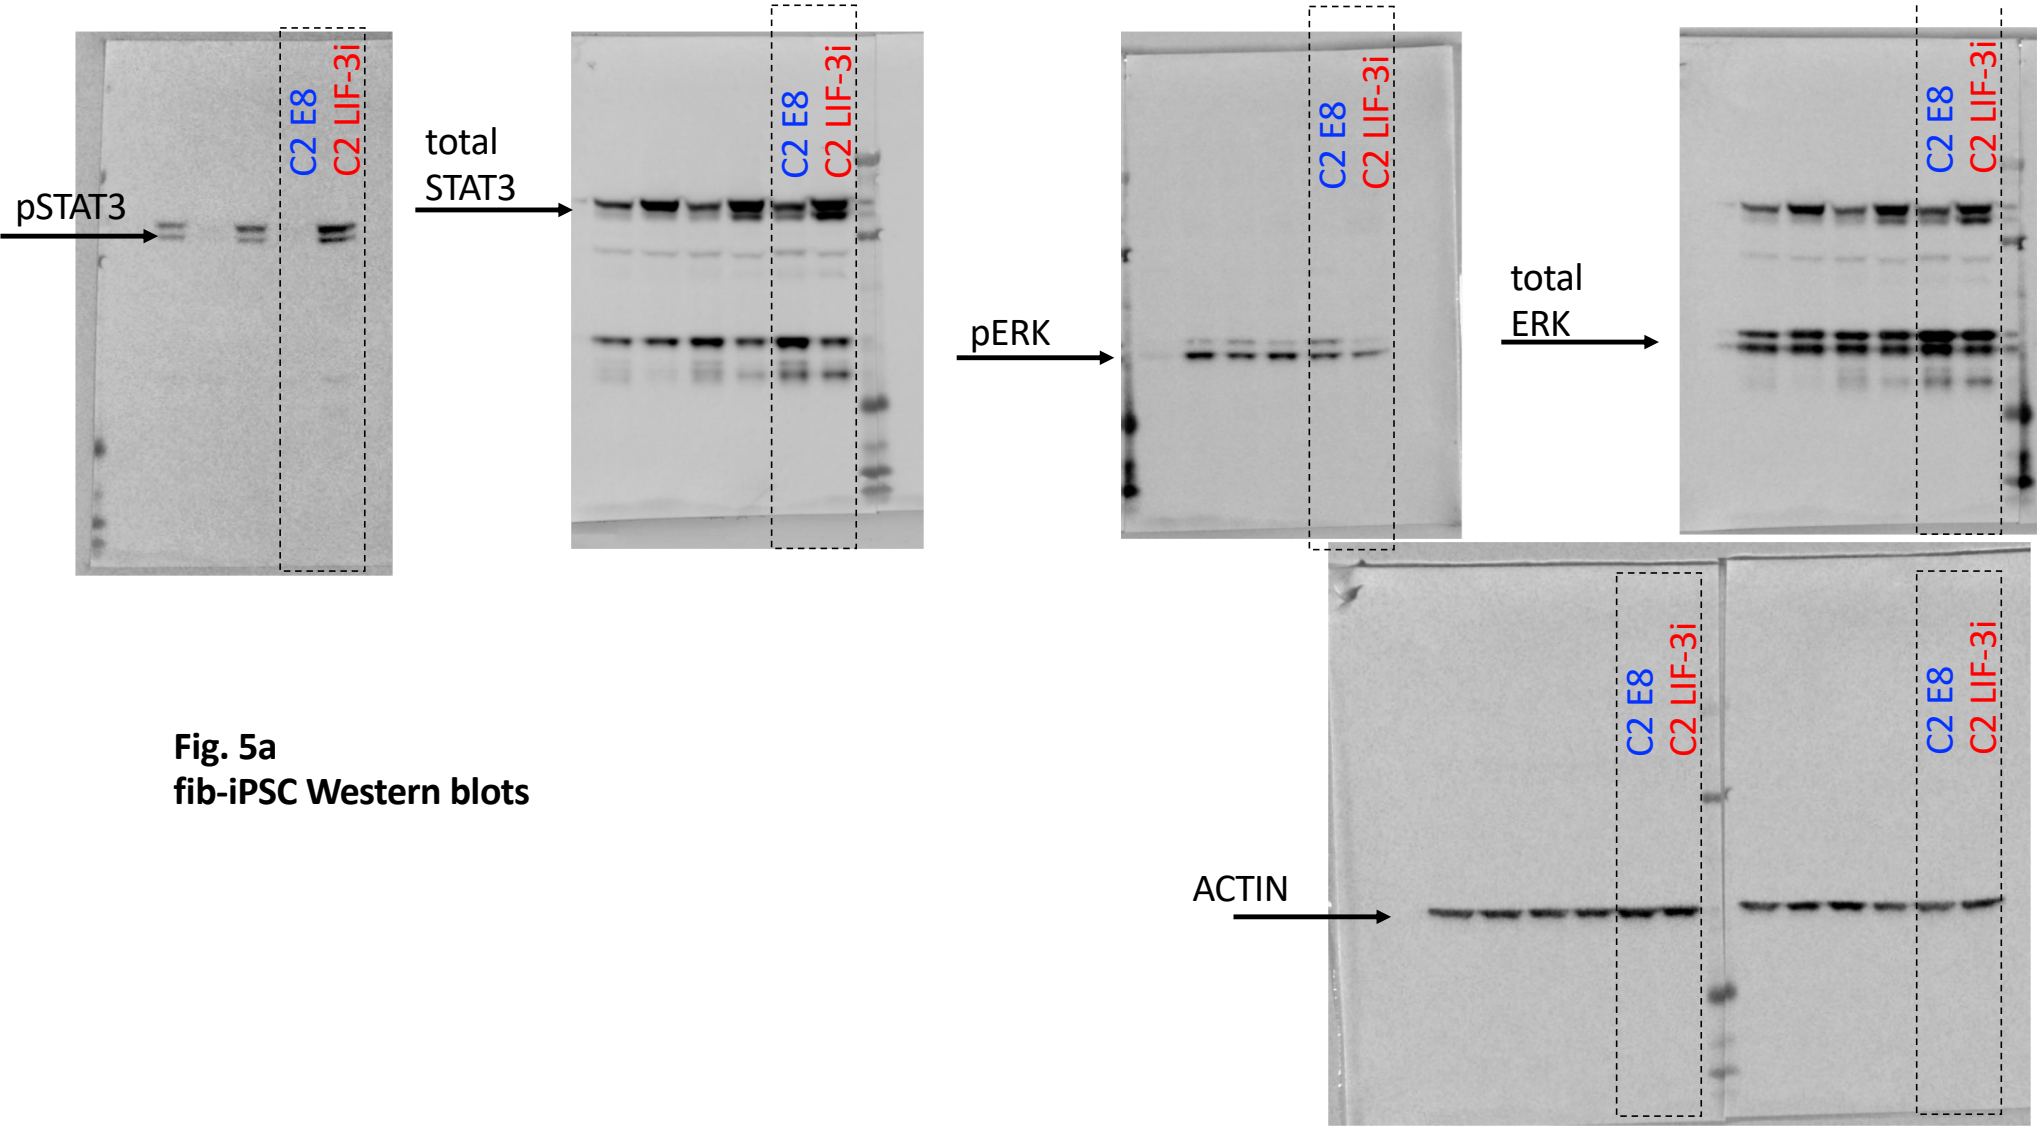

**Fig. 5a**  
**fib-iPSC Western blots**

**Fig. 5c**  
**Western blots**

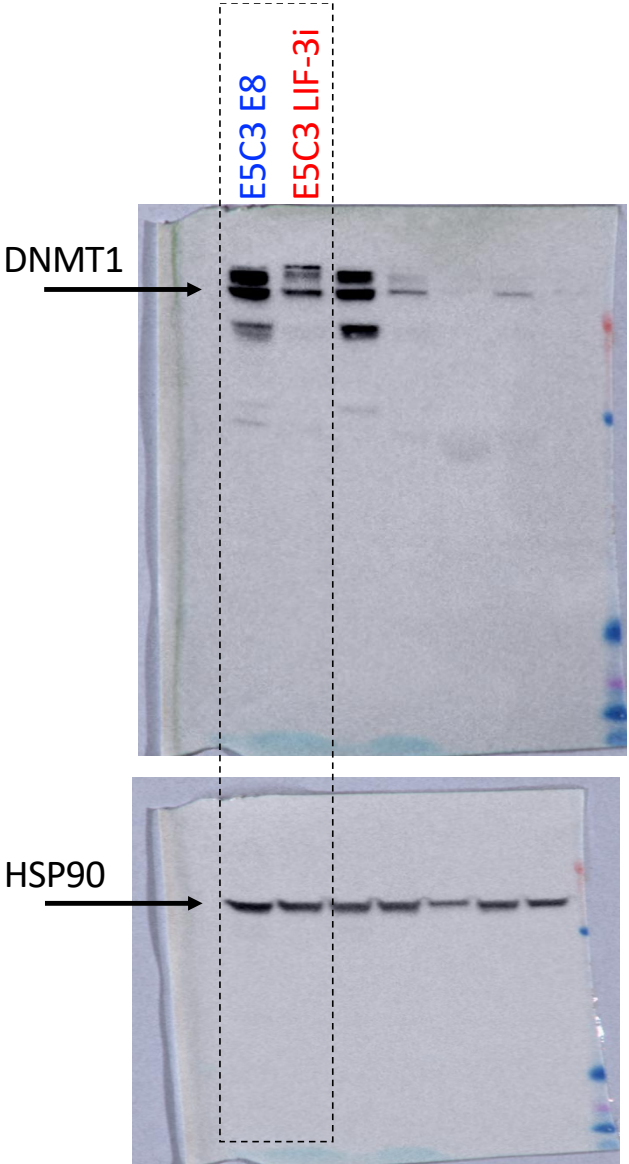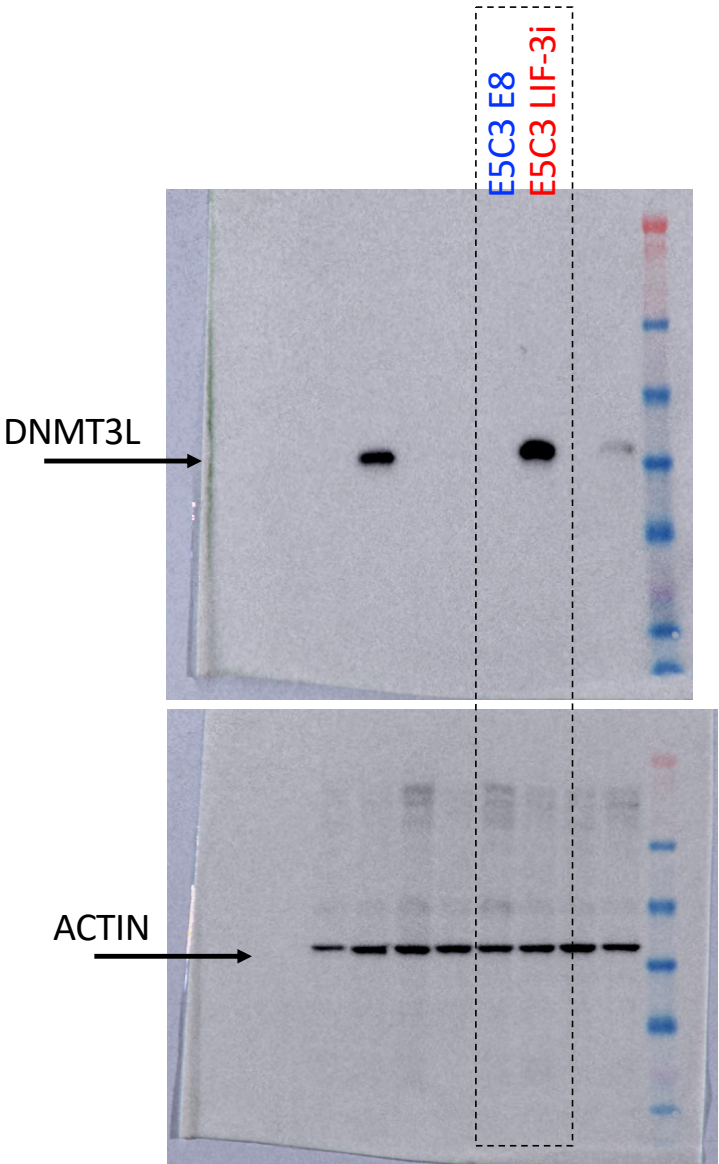

Supplement: 41536_2021_135_MOESM1_ESM.pdf [file 41536_2021_135_MOESM1_ESM.pdf]
